# Supplementary material for: En bloc TGN recruitment of Aspergillus TRAPPII reveals TRAPP maturation as unlikely to drive RAB1-to-RAB11 transition
Source: Oxford University Press journal article supplement (doi:10.1242/jcs.241141), 2020-04-23
Supplement: jcs241141supp.pdf [file jcs241141supp.pdf]

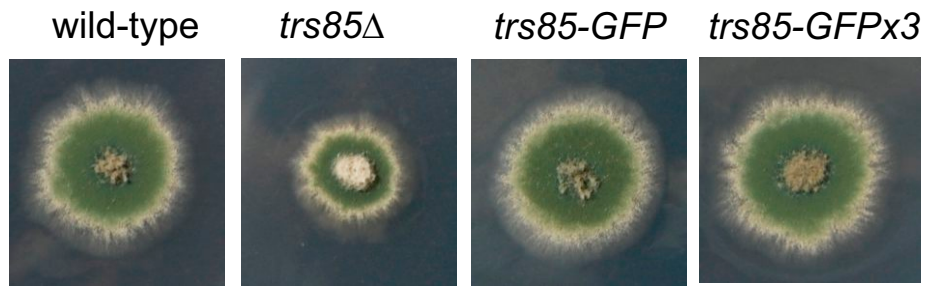

**Figure S1. GFP-tagging of Trs85 does not impair growth.**

Colonies of the indicated genotypes were cultured on synthetic complete medium for 3 days at 37°C

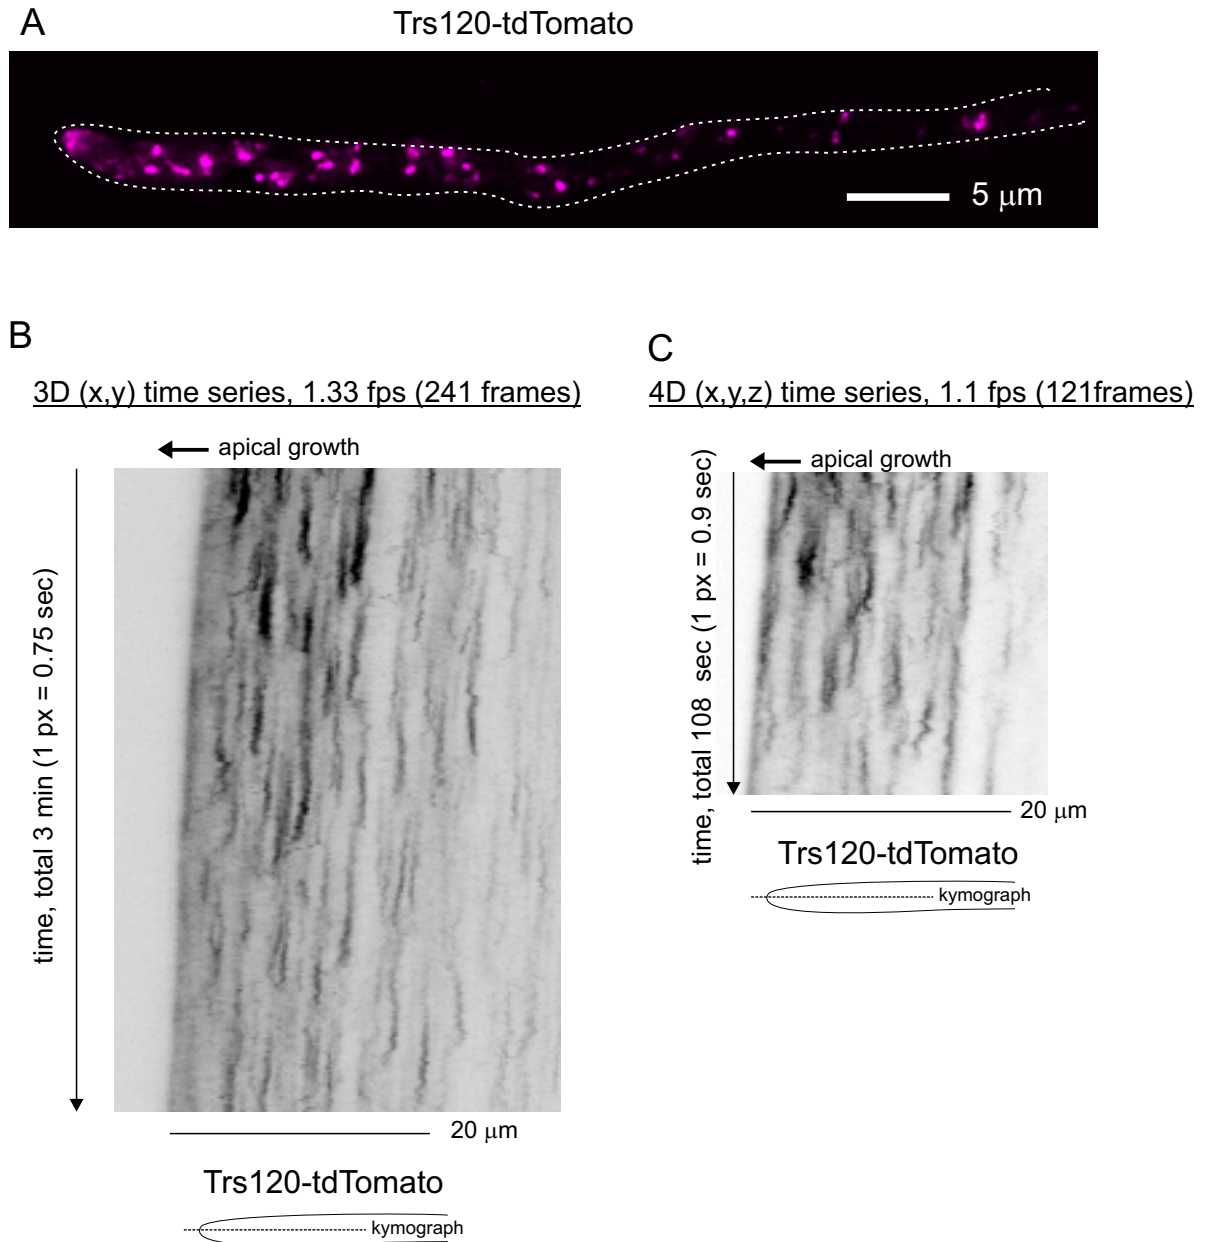

**Figure S2. Transient recruitment of TRAPP<sup>II</sup> to TGN cisternae as determined with Trs120-tdT**

(A) Maximal intensity projection of a deconvolved Z-stack of a cell expressing Trs120-tdT. (B)(C) Kymographs derived from 3D and 4D movies illustrating that Trs120-tdT behaves as Trs120-GFPX3 over time. The 3D movie in (B) is 3 min- and 241 frames-long and was acquired with 2x2 binning.

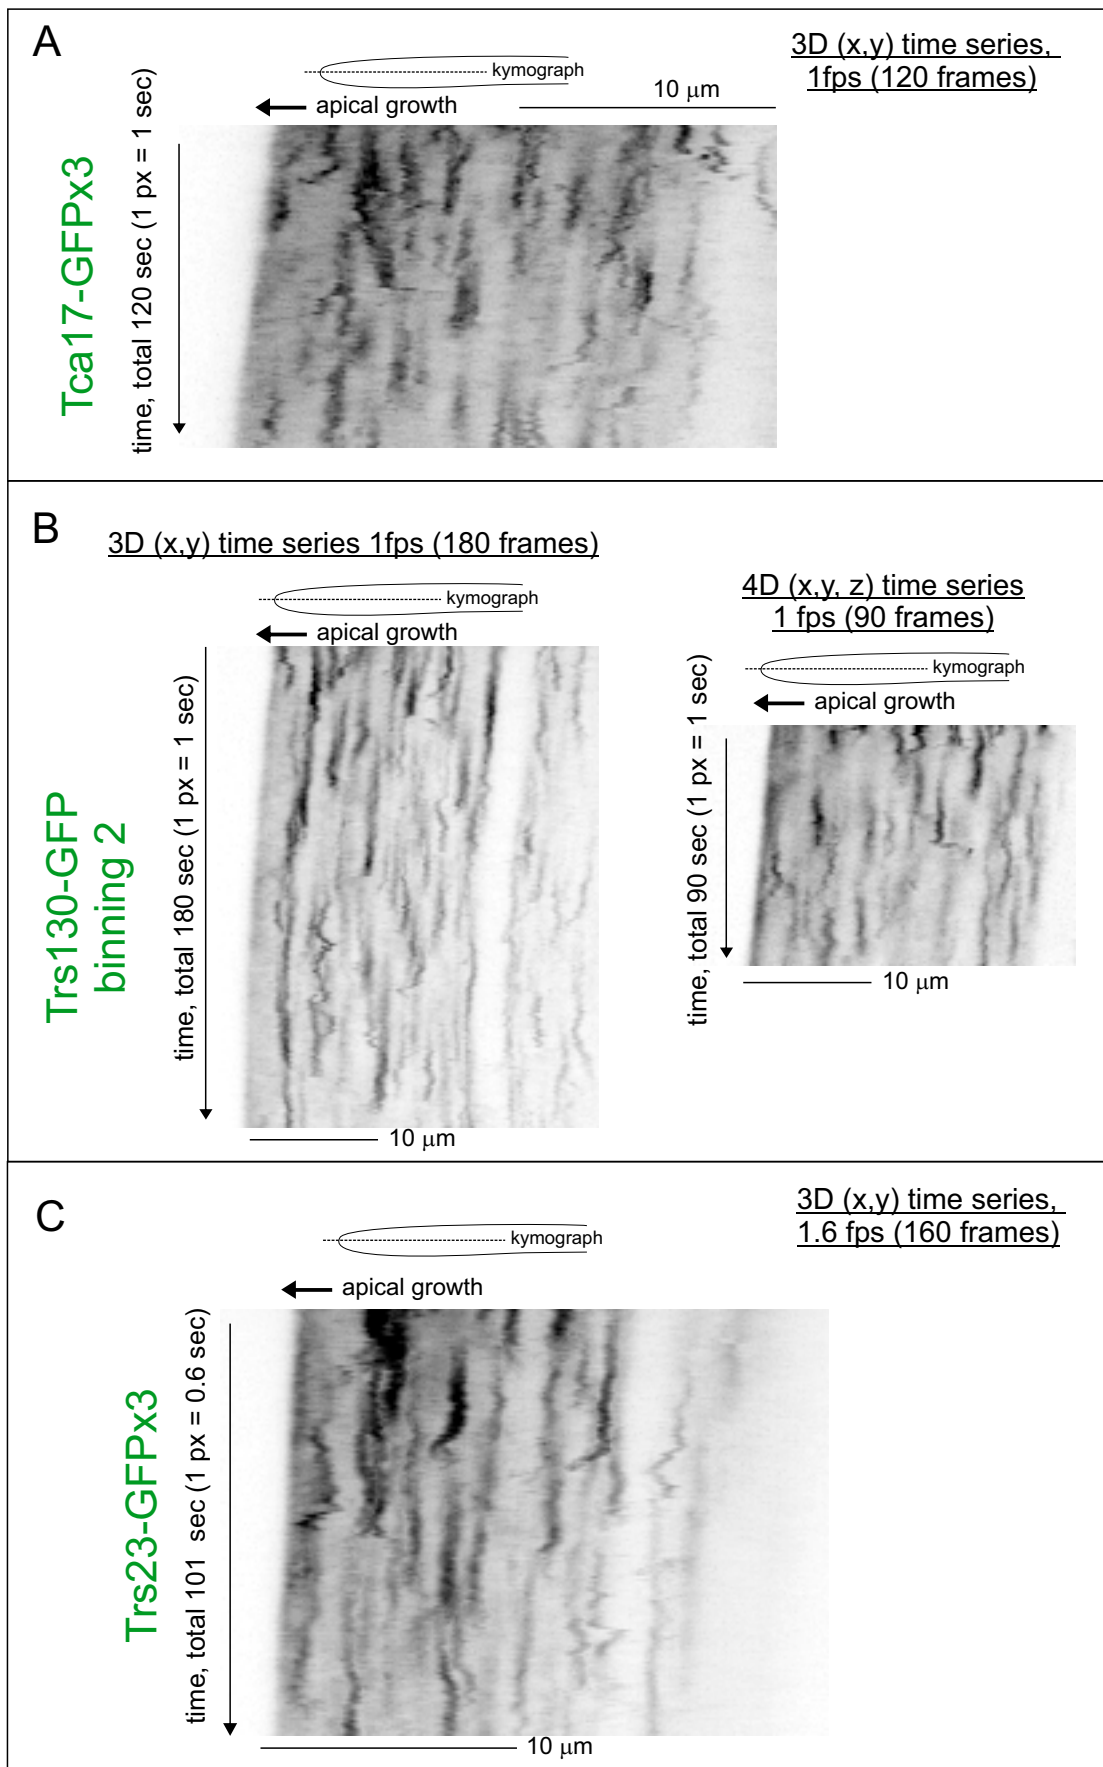

**Figure S3. Transient recruitment of other TRAPP subunits to TGN cisternae** 3D or 4D movies, as indicated, of strains expressing: (A) Tca17-GFPx3. (B) Trs130-GFP. (C) Trs23-GFPx3. Acquired with the specified conditions.

Endogenously tagged Bet3 fusion proteins

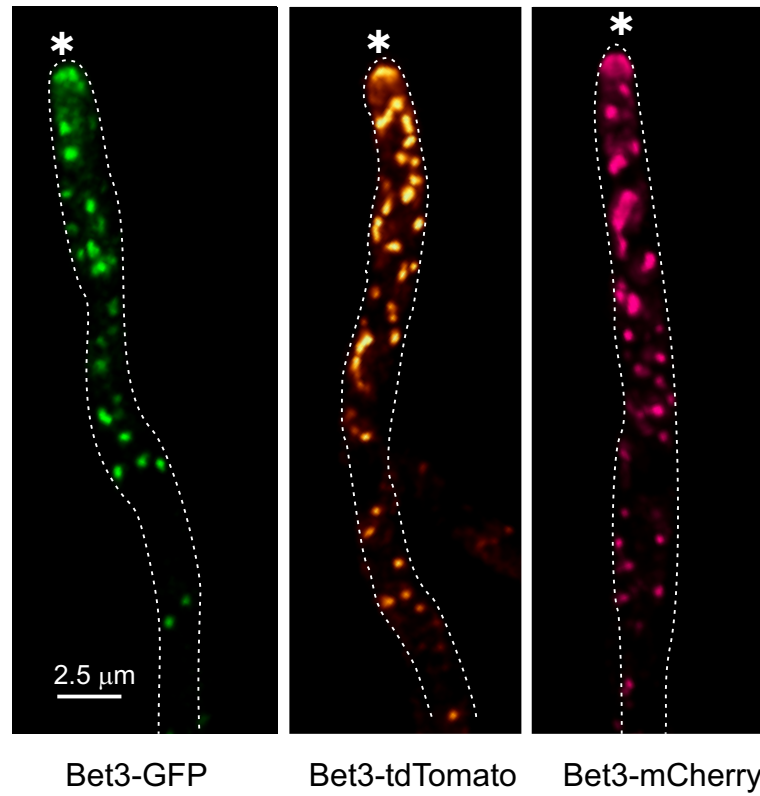

**Figure S4. Bet3 localization with different fluorescent protein tags**  
Images are maximal intensity projections of deconvolved Z-stacks. Asterisks indicate the SPKs

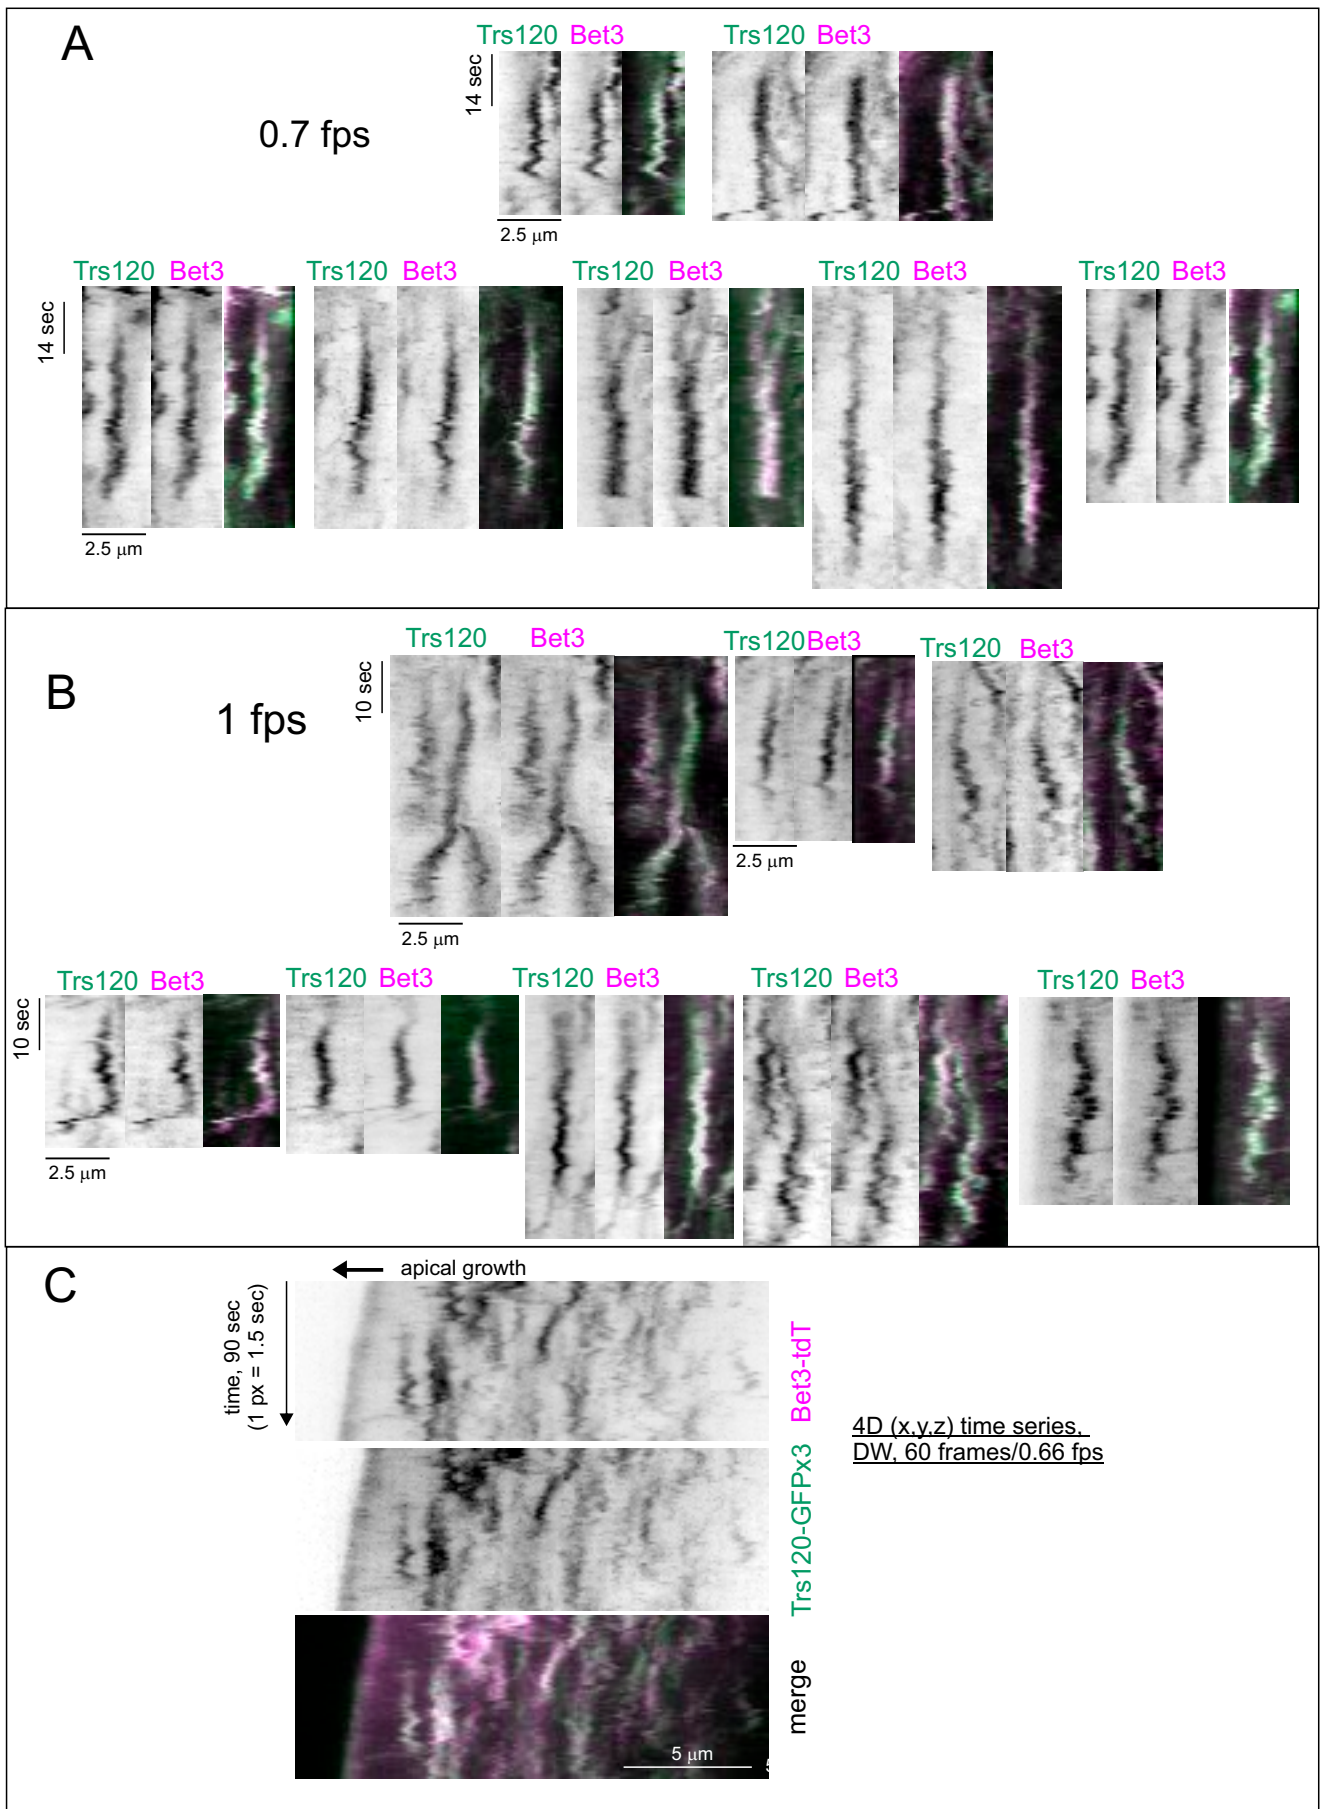

**Figure S5. Trs120 and Bet3 strictly colocalize continuously on TGN cisternae.** (A) Multiple examples showing that Trs120-GFPx3 and Bet3-tdT simultaneously accumulate at, and dissipate from maturing TGN cisternae. Kymographs from which these examples were extracted were obtained from 3D movies of the two channels simultaneously acquired with a beam splitter at a  $Tr$  of 0.7 fps. (B) As above, but using 3D movies with a  $Tr$  of 1 fps. (C) Overall view of a kymograph obtained from a 4D movie acquired with a beam splitter at a  $Tr$  of 0.66 fps. Note the clear example of the maturing cisterna closest to the SPK.

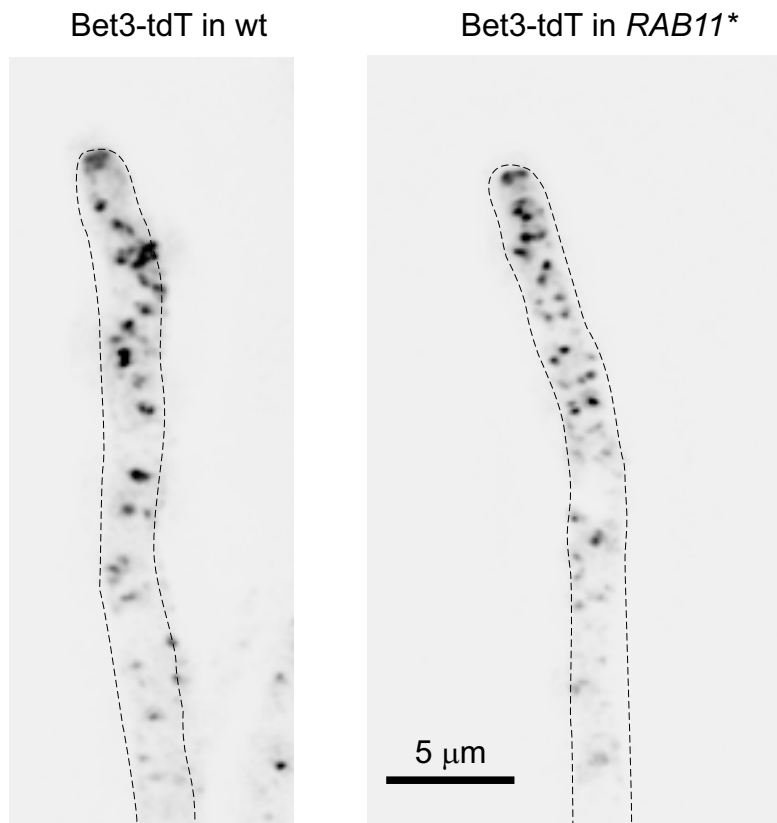

**Figure S6. Bet3-tdT localization to the TGN is not altered by RAB11\*.** Images are maximal intensity projections of deconvolved z-stacks.

Table S1: Strains used in this work

| Strain code | Genotype                                                                                                                                      |
|-------------|-----------------------------------------------------------------------------------------------------------------------------------------------|
| MAD3921     | <i>trs120::gfp::pyrG<sup>Af</sup> pyrG89; pyroA4 nkuAΔ::bar</i>                                                                               |
| MAD4397     | <i>pyrG89; trs85::gfp::pyrG<sup>Af</sup> pyroA4 nkuAΔ::bar</i>                                                                                |
| MAD5319     | <i>pyrG89; pyroA4 nkuAΔ::bar; riboB2</i>                                                                                                      |
| MAD5321     | <i>pyroA4 nkuAΔ::bar; riboB2</i>                                                                                                              |
| MAD5736     | <i>pyrG89; pyroA4 nkuAΔ::bar</i>                                                                                                              |
| MAD5743     | <i>pyrG89 sec7::gfp::pyrG<sup>Af</sup> pyroA4 nkuAΔ::bar</i>                                                                                  |
| MAD6305     | <i>pyrG89; pyroA4 nkuAΔ::bar; bet5::gfp::pyrG<sup>Af</sup></i>                                                                                |
| MAD6317     | <i>pyrG89; bet5::mcherry::pyrG<sup>Af</sup> pyroA4 nkuAΔ::bar</i>                                                                             |
| MAD6381     | <i>pyrG89; pyroA4 nkuAΔ::bar; bet3::gfp::pyrG<sup>Af</sup></i>                                                                                |
| MAD6420     | <i>trs20::gfp::pyrG<sup>Af</sup> pyrG89; pyroA4 nkuAΔ::bar</i>                                                                                |
| MAD6439     | <i>pyrG89; trs23::gfp::pyrG<sup>Af</sup> pyroA4 nkuAΔ::bar</i>                                                                                |
| MAD6443     | <i>trs31::gfp::pyrG<sup>Af</sup> pyrG89; pyroA4 nkuAΔ::bar</i>                                                                                |
| MAD6461     | <i>pyrG89?; trs85Δ::pyrG<sup>Af</sup> nkuAΔ::bar?; riboB2</i>                                                                                 |
| MAD6610     | <i>trs33::gfp::pyrG<sup>Af</sup> pyrG89 pabaA1; nkuAΔ::bar</i>                                                                                |
| MAD6635     | <i>[rab11<sup>P</sup>::rabE::rab11<sup>P</sup>::mcherry::rab11::pyrG<sup>Af</sup>] pyrG89 pabaA1; nkuAΔ::bar</i>                              |
| MAD6639     | <i>pyrG89 pabaA1; nkuAΔ::bar; bet5-3x-gfp::pyrG<sup>Af</sup></i>                                                                              |
| MAD6648     | <i>trs31::3x-gfp::pyrG<sup>Af</sup> pabaA1 pyrG89; nkuAΔ::bar</i>                                                                             |
| MAD6672     | <i>trs120::3x-gfp::pyrG<sup>Af</sup> pyrG89; pyroA4 nkuAΔ::bar</i>                                                                            |
| MAD6726     | <i>pabaA1 pyrG89; trs23::3x-gfp::pyrG<sup>Af</sup> nkuAΔ::bar</i>                                                                             |
| MAD6760     | <i>trs120::3x-gfp::pyrG<sup>Af</sup> pyrG89; nkuAΔ::bar; [rab11<sup>P</sup>::rab11::rab11<sup>P</sup>::mcherry::rab11::pyrG<sup>Af</sup>]</i> |
| MAD6780     | <i>pabaA1 pyrG89; tca17::gfp::pyrG<sup>Af</sup>; nkuAΔ::bar</i>                                                                               |
| MAD6783     | <i>pabaA1 pyrG89; nkuAΔ::bar; bet3::mcherry::pyrG<sup>Af</sup></i>                                                                            |
| MAD6807     | <i>trs120::tdTomato::pyrG<sup>Af</sup> pabaA1 pyrG89; nkuAΔ::bar</i>                                                                          |
| MAD6826     | <i>pabaA1 pyrG89; nkuAΔ::bar; bet3::tdTomato::pyrG<sup>Af</sup></i>                                                                           |
| MAD6835     | <i>pyrG89; pyroA4 nkuAΔ::bar; trs65::gfp::pyrG<sup>Af</sup></i>                                                                               |
| MAD6837     | <i>pyrG89; pyroA4 nkuAΔ::bar; trs130::gfp::pyrG<sup>Af</sup></i>                                                                              |
| MAD6865     | <i>pyrG89; tca17::3x-gfp::pyrG<sup>Af</sup>; pyroA4 nkuAΔ::bar</i>                                                                            |
| MAD6867     | <i>trs120::3x-gfp::pyrG<sup>Af</sup> pyrG89; pyroA4 nkuAΔ::bar; bet3::tdTomato::pyrG<sup>Af</sup></i>                                         |
| MAD6971     | <i>trs120Δ::pyrG<sup>Af</sup> pyrG89; pyroA4 nkuAΔ::bar; bet3::tdTomato::pyrG<sup>Af</sup>; rab11<sup>D125E</sup></i>                         |
| MAD6973     | <i>trs120Δ::pyrG<sup>Af</sup> pyrG89; trs23::3x-gfp::pyrG<sup>Af</sup> pyroA4 nkuAΔ::bar; rab11<sup>D125E</sup></i>                           |
| MAD6982     | <i>sec7::gfp::pyrG<sup>Af</sup> pyrG89; pyroA4 nkuAΔ::bar; bet3::tdTomato::pyrG<sup>Af</sup></i>                                              |
| MAD7025     | <i>pyrG89?; pyroA4::[pyroA<sup>*</sup>- gpd<sup>mini</sup>::gfp::sedV] nkuAΔ::bar?; pantoB100; bet3::tdTomato::pyrG<sup>Af</sup></i>          |
| MAD7027     | <i>trs120::tdTomato::pyrG<sup>Af</sup> sec7::gfp::pyrG<sup>Af</sup> pabaA1 pyrG89; pyroA4 nkuAΔ::bar</i>                                      |
| MAD7042     | <i>sec7::tdTomato::pyrG<sup>Af</sup> pyrG89; pyroA4 nkuAΔ::bar</i>                                                                            |
| MAD7044     | <i>pyrG89; trs85::mcherry::pyrG<sup>Af</sup> pyroA4 nkuAΔ::bar</i>                                                                            |
| MAD7056     | <i>trs120::3x-gfp::pyrG<sup>Af</sup> sec7::tdTomato::pyrG<sup>Af</sup> pabaA1 pyrG89; pyroA4 nkuAΔ::bar</i>                                   |
| MAD7067     | <i>pabaA1 pyrG89; trs85::3x-gfp::pyrG<sup>Af</sup> nkuAΔ::bar</i>                                                                             |
| MAD7405     | <i>pyrG89 trs120Δ::pyrG<sup>Af</sup>; trs85::3x-gfp::pyrG<sup>Af</sup> pyroA4 nkuAΔ::bar; rab11<sup>D125E</sup></i>                           |
| MAD7416     | <i>pyrG89; nkuAΔ::bar; bet3::tdTomato::pyrG<sup>Af</sup>; rab11<sup>D125E</sup></i>                                                           |

## Supplemental movies

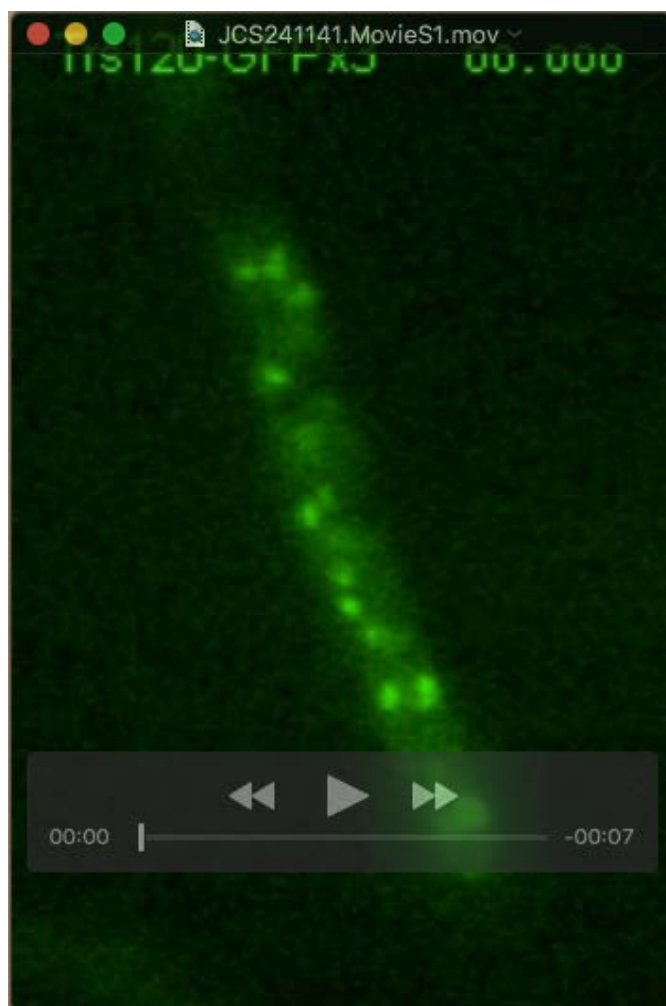

### Movie 1: 3D movie of Trs120-GFPx3

Consisting of 210 middle planes acquired every 0.5 sec and reproduced at 30 fps. Time stamp in sec.msec.

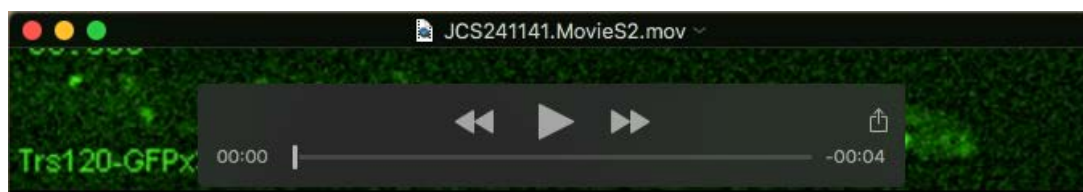

### Movie 2: 4D movie of Trs120-GFPx3.

Consisting of 120 frames; each frame is the maximal intensity projection of a 2  $\mu$ m-deep Z-stack acquired every 1.5 sec and reproduced at 30 fps. Time stamp in sec.msec.



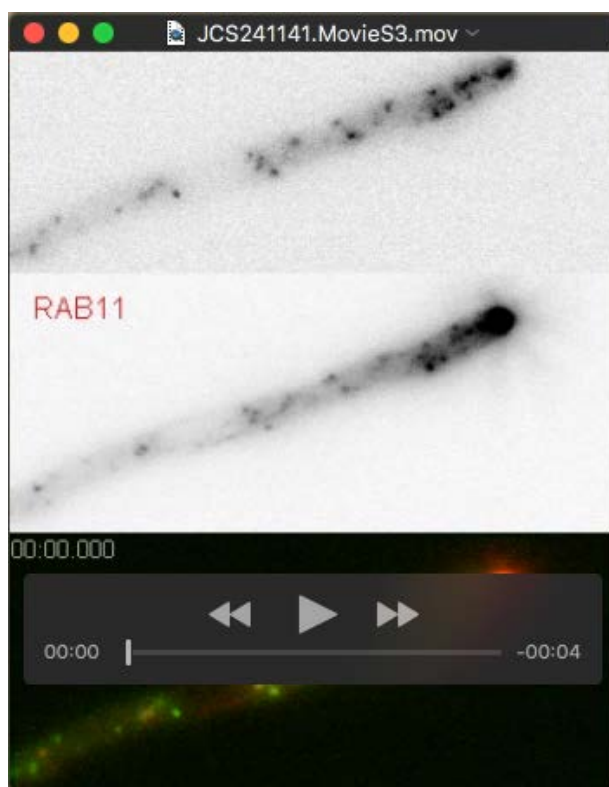

**Movie 3: 4D movie of Trs120-GFPx3 and mCh-RAB11**

Consisting of 62 frames; each frame is a maximal intensity projection of a Z-stack in which the two channels were simultaneously acquired with a beam splitter every 1.2 sec; the movie is reproduced at 15 fps. Time stamp in min:sec.msec.

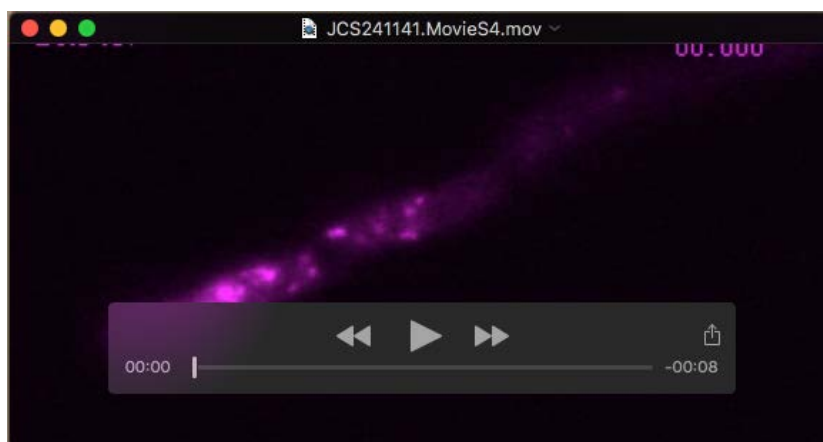

**Movie 4: 4D movie of Bet3-tdTomato**

Consisting of 120 frames; each frame is a maximal intensity projection of a Z-stack acquired every 1 sec. Reproduced at 15 fps. Time stamp in sec.msec.

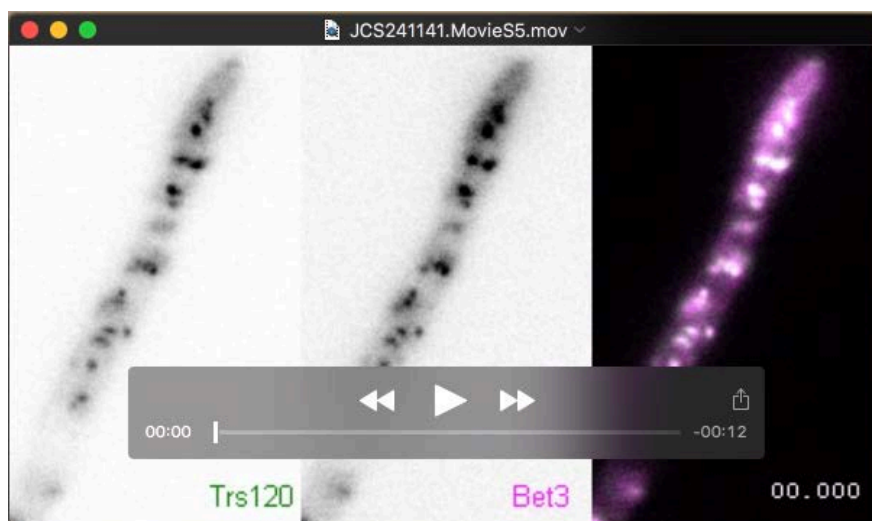

**Movie 5: 3D movie of Trs120-GFPx3 and Bet3-tdTomato**

Consisting of 180 middle planes in which the two channels were simultaneously acquired with a beam splitter every 1 sec; the movie is reproduced at 30 fps. Time stamp in sec.msec.

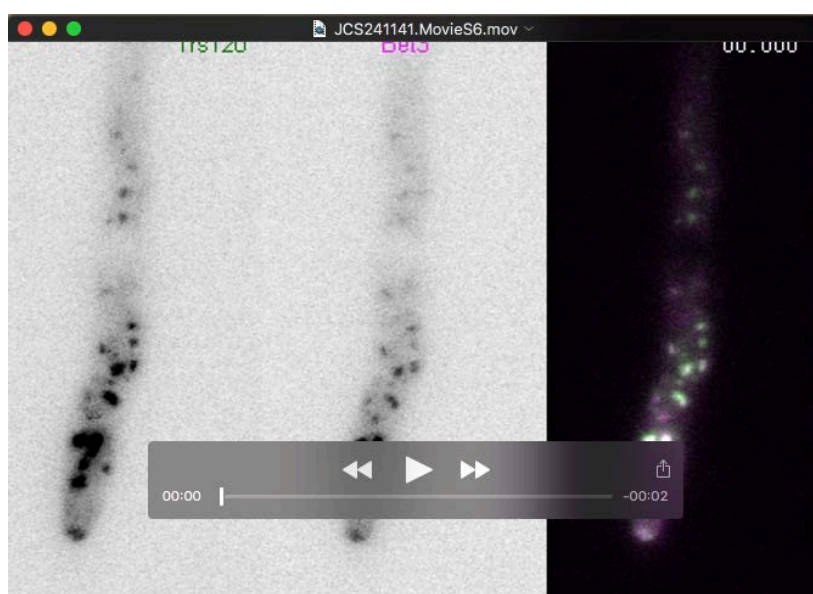

**Movie 6: 4D movie of Trs120-GFPx3 and Bet3-tdTomato**

Consisting of 61 frames; each frame is a maximal intensity projection of a Z-stack. The GFP and tdT channels were simultaneously acquired every 1.5 sec. Reproduced at 30 fps. Time stamp in sec.msec.
